# Supplementary material for: Water Access, Sanitation, and Hygiene Conditions and Health Outcomes among Two Settlement Types in Rural Far North Cameroon
Source: MDPI journal article supplement (doi:10.3390/ijerph14040441), 2017-04-20
Supplement: s1 [file s1]

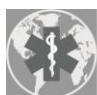

# Water Access, Sanitation, and Hygiene Conditions and Health Outcomes among Two Settlement Types in Rural Far North Cameroon

Tyler J. Gorham, Joshua Yoo, Rebecca Garabed, Arabi Mouhaman and Jiyoung Lee

## Supplementary materials

**Table S1.** Open Defecation rate and Hygiene Facility Availability.

|                        | Village     | Camp       |
|------------------------|-------------|------------|
| <b>Open Defecation</b> | 4 (2.6%)    | 15 (19.0%) |
| <b>Outdoor Latrine</b> | 122 (79.2%) | 64 (81.0%) |
| <b>Indoor Facility</b> | 28 (18.2%)  | 0 (0%)     |

Outdoor latrine access was similar between the two study populations. No indoor facilities were reported among camp households, reflecting their nomadic herding lifestyle.

**Table S2.** Household-level Handwashing Rates.

| How often do all family members wash their hands |           | Village | Camp  | $\chi^2$ <i>p</i> -value |
|--------------------------------------------------|-----------|---------|-------|--------------------------|
| before a meal?                                   | Always    | 100.0%  | 83.5% | 0.08                     |
|                                                  | Sometimes | 0.0%    | 16.5% |                          |
|                                                  | Never     | 0.0%    | 0.0%  |                          |
| with soap before a meal?                         | Always    | 20.8%   | 7.0%  | 0.07                     |
|                                                  | Sometimes | 45.8%   | 21.4% |                          |
|                                                  | Never     | 33.3%   | 71.4% |                          |
| with soap after a meal?                          | Always    | 30.4%   | 7.1%  | 0.12                     |
|                                                  | Sometimes | 30.4%   | 21.4% |                          |
|                                                  | Never     | 39.1%   | 71.4% |                          |

“Always” responses were consistently higher among villages and “never” responses were consistently higher among camps, but the proportions of responses were not significantly different between villages and camps for any question.

**Table S3.** Incidence of Reported Gastrointestinal Health Conditions in Past 28 Days.

| Gastrointestinal Health | Village | Camp | Fisher's Exact <i>p</i> -value |
|-------------------------|---------|------|--------------------------------|
| Diarrhea                | 3.2%    | 8.4% | 0.12                           |
| Bloody diarrhea         | 1.3%    | 3.6% | 0.34                           |
| Cramps                  | 15.4%   | 8.2% | 0.16                           |

No significant difference was found between villages and camps across the three gastrointestinal health indicators.
